# Supplementary material
Source: Springer Nature journal article supplement (https://www.springermedizin.de/resource/supplementary/12907_2005_31_MOESM2_ESM.pdf/9524954)

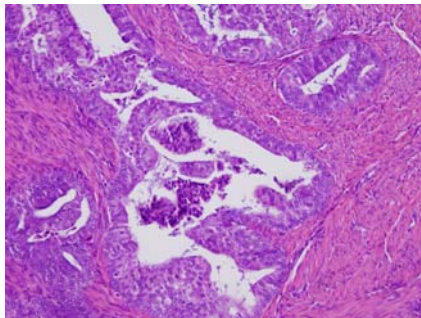

**2a**

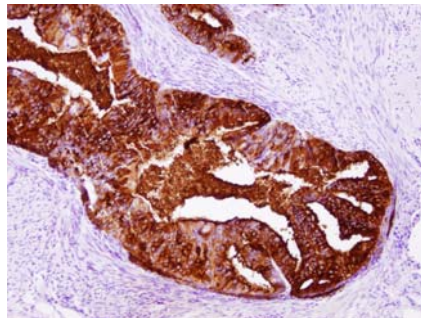

**2b**

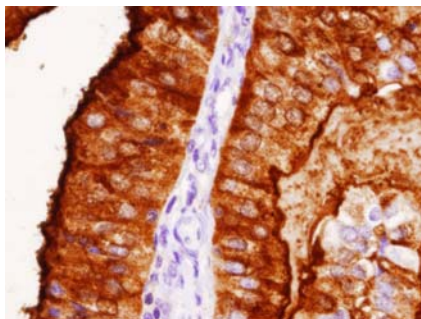

**2c**

Supplement: MOESM2 [file 9524954]
